# Supplementary material
Source: publisher figshare collection journal article supplement (https://springernature.figshare.com/ndownloader/files/14089376)

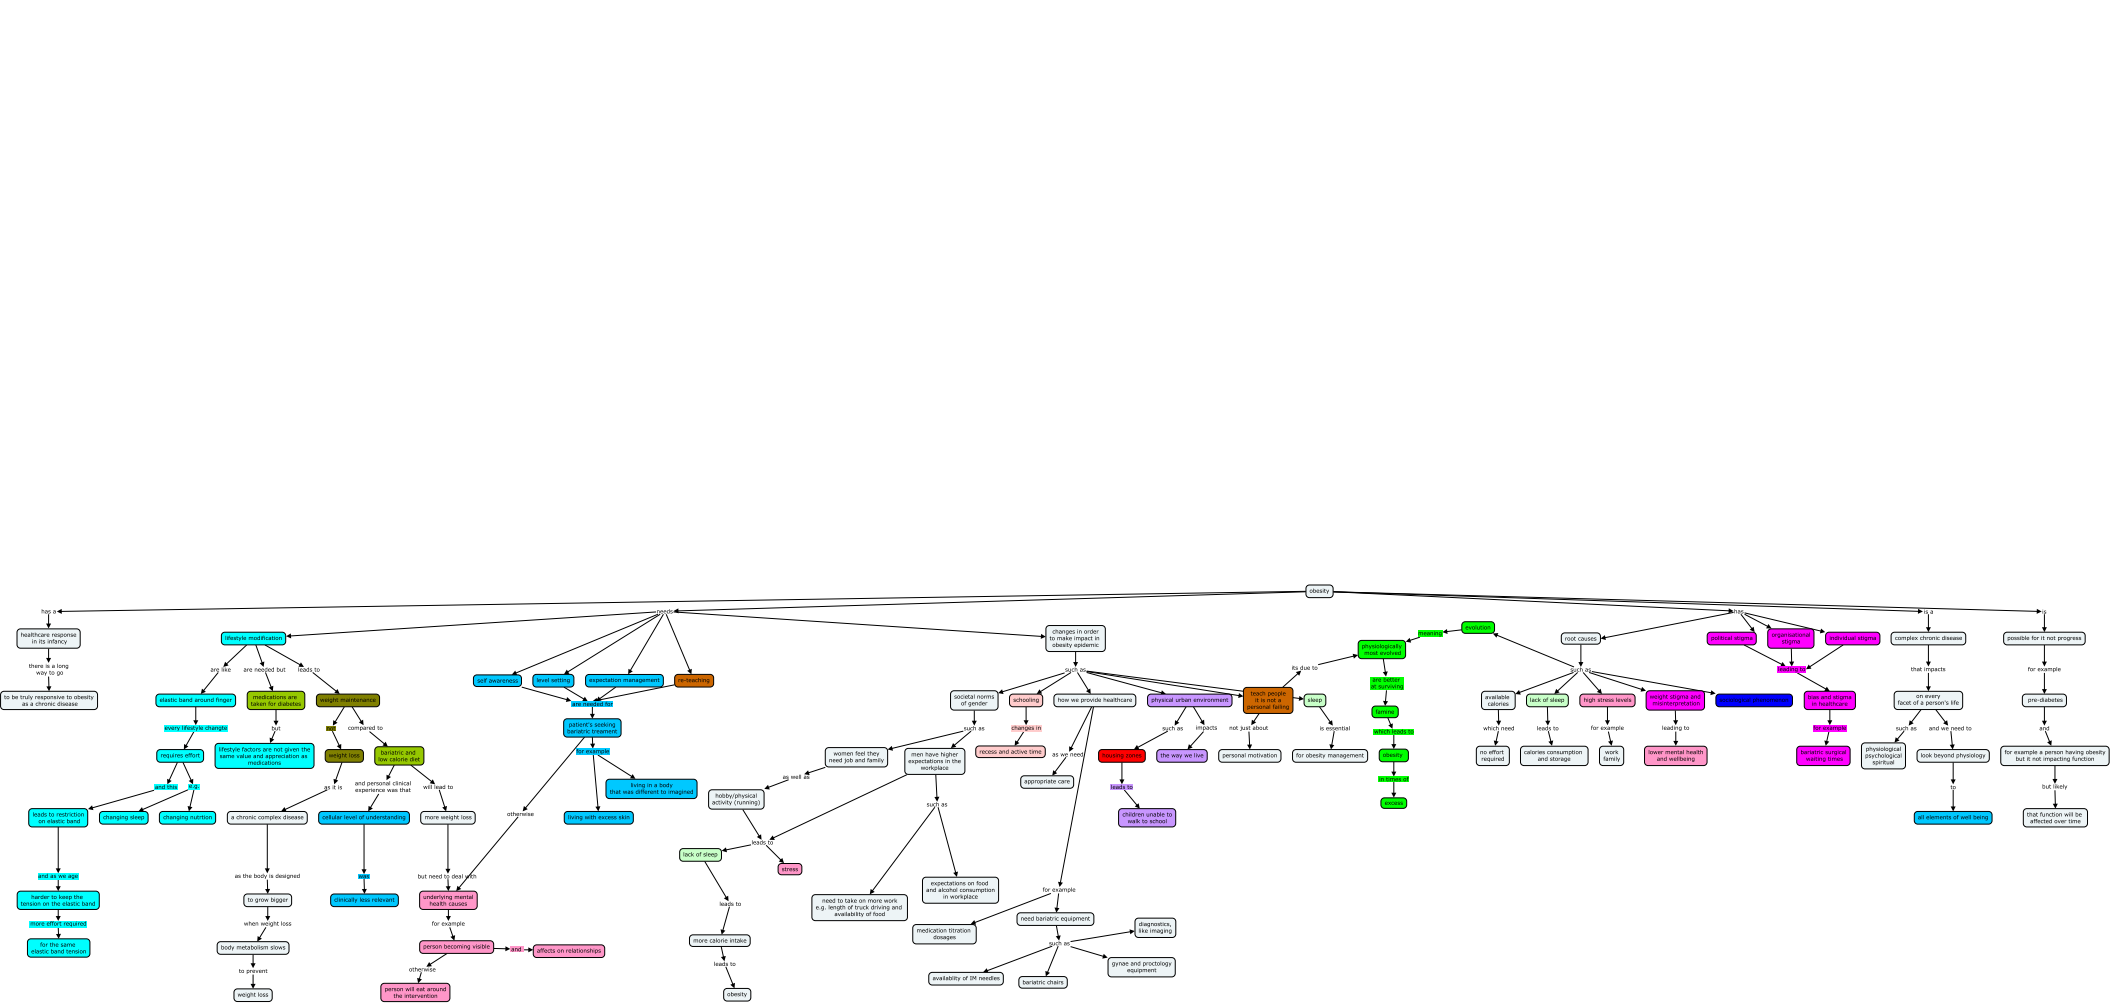

Supplement: Supplementary file [file 14089376]
